# Supplementary material for: Amidst multiple binding orientations on fork DNA, Saccharolobus MCM helicase proceeds N-first for unwinding
Source: eLife journal article supplement (doi:10.7554/elife.46096), 2019-10-29
Supplement: supp [file elife-46096-supp-v1.zip]

Archive with 8 entries (8 files):
- elife_poa_e46096_Figure_4_figure_supplement_1.tif
- elife_poa_e46096_Supplementary_file_1.docx
- elife_poa_e46096_Figure_1_figure_supplement_2.tif
- elife_poa_e46096_Figure_1_figure_supplement_1.tif
- elife_poa_e46096_Figure_1_figure_supplement_3.tif
- elife_poa_e46096_Figure_6_figure_supplement_1.tif
- elife_poa_e46096_Transparent_Reporting_File.pdf
- elife_poa_e46096_Figure_1_figure_supplement_4.tif
