# Supplementary figures and images for: Amidst multiple binding orientations on fork DNA, Saccharolobus MCM helicase proceeds N-first for unwinding
Source: eLife journal article supplement (doi:10.7554/elife.46096), 2019-10-29

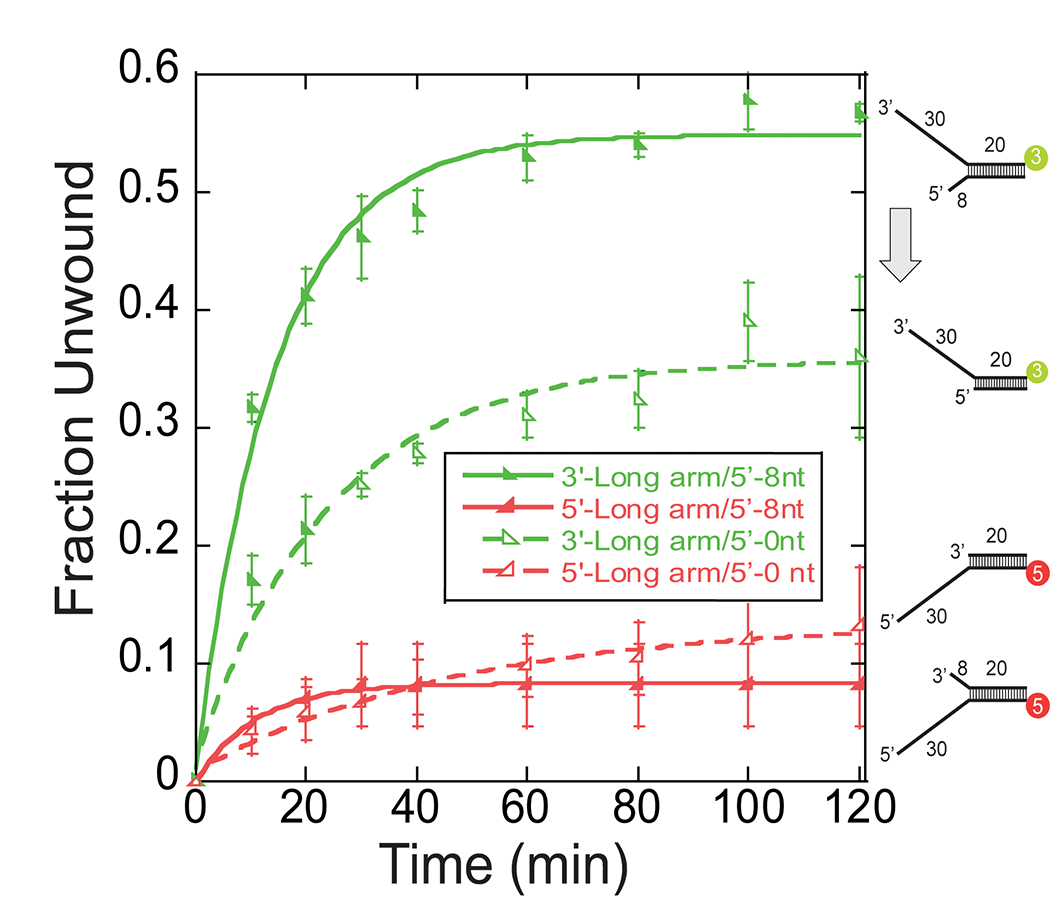

Supplement: supp [file elife-46096-supp-v1.zip › elife_poa_e46096_Figure_4_figure_supplement_1.tif]

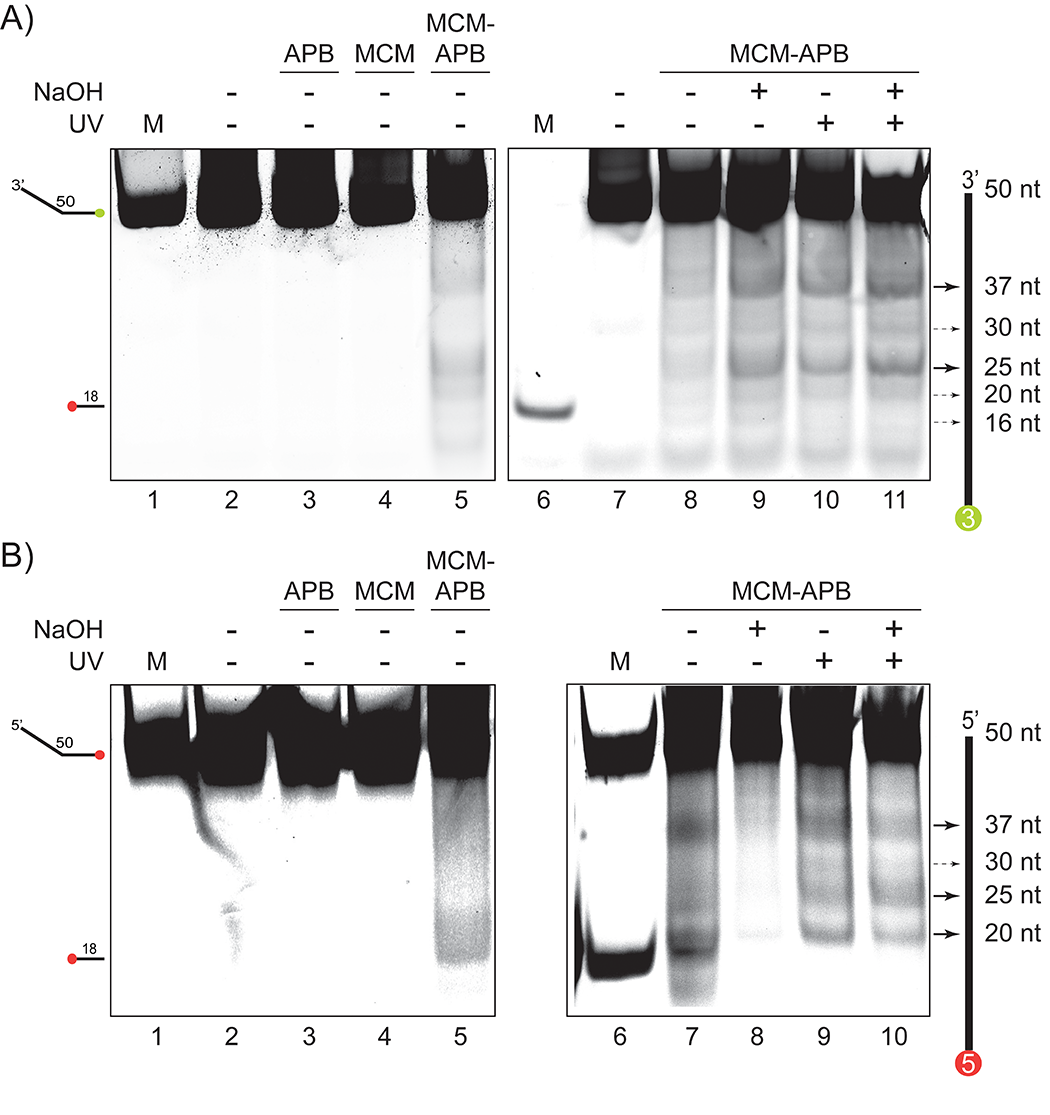

Supplement: supp [file elife-46096-supp-v1.zip › elife_poa_e46096_Figure_1_figure_supplement_2.tif]

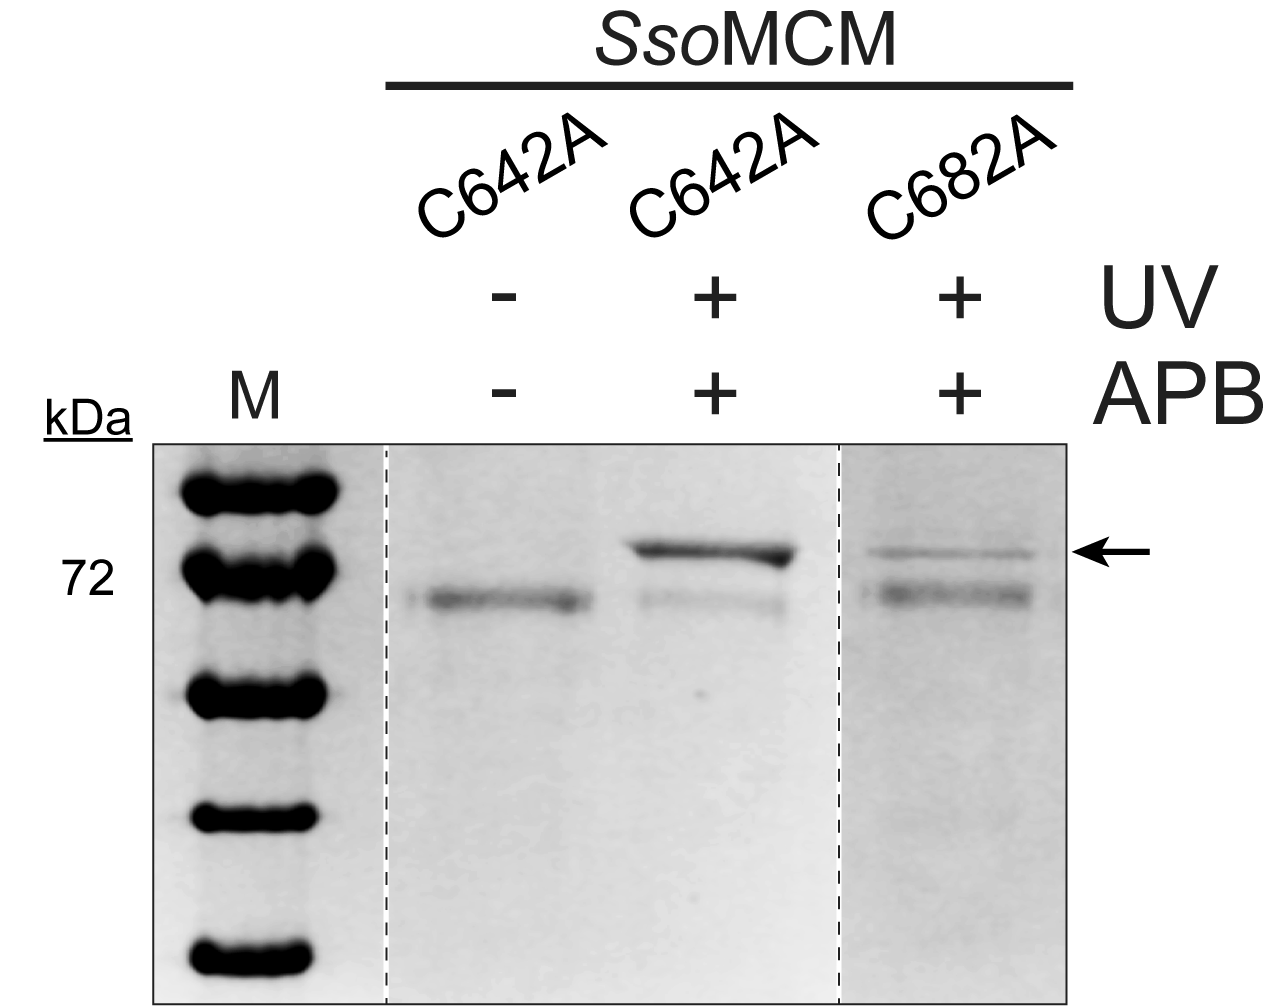

Supplement: supp [file elife-46096-supp-v1.zip › elife_poa_e46096_Figure_1_figure_supplement_1.tif]

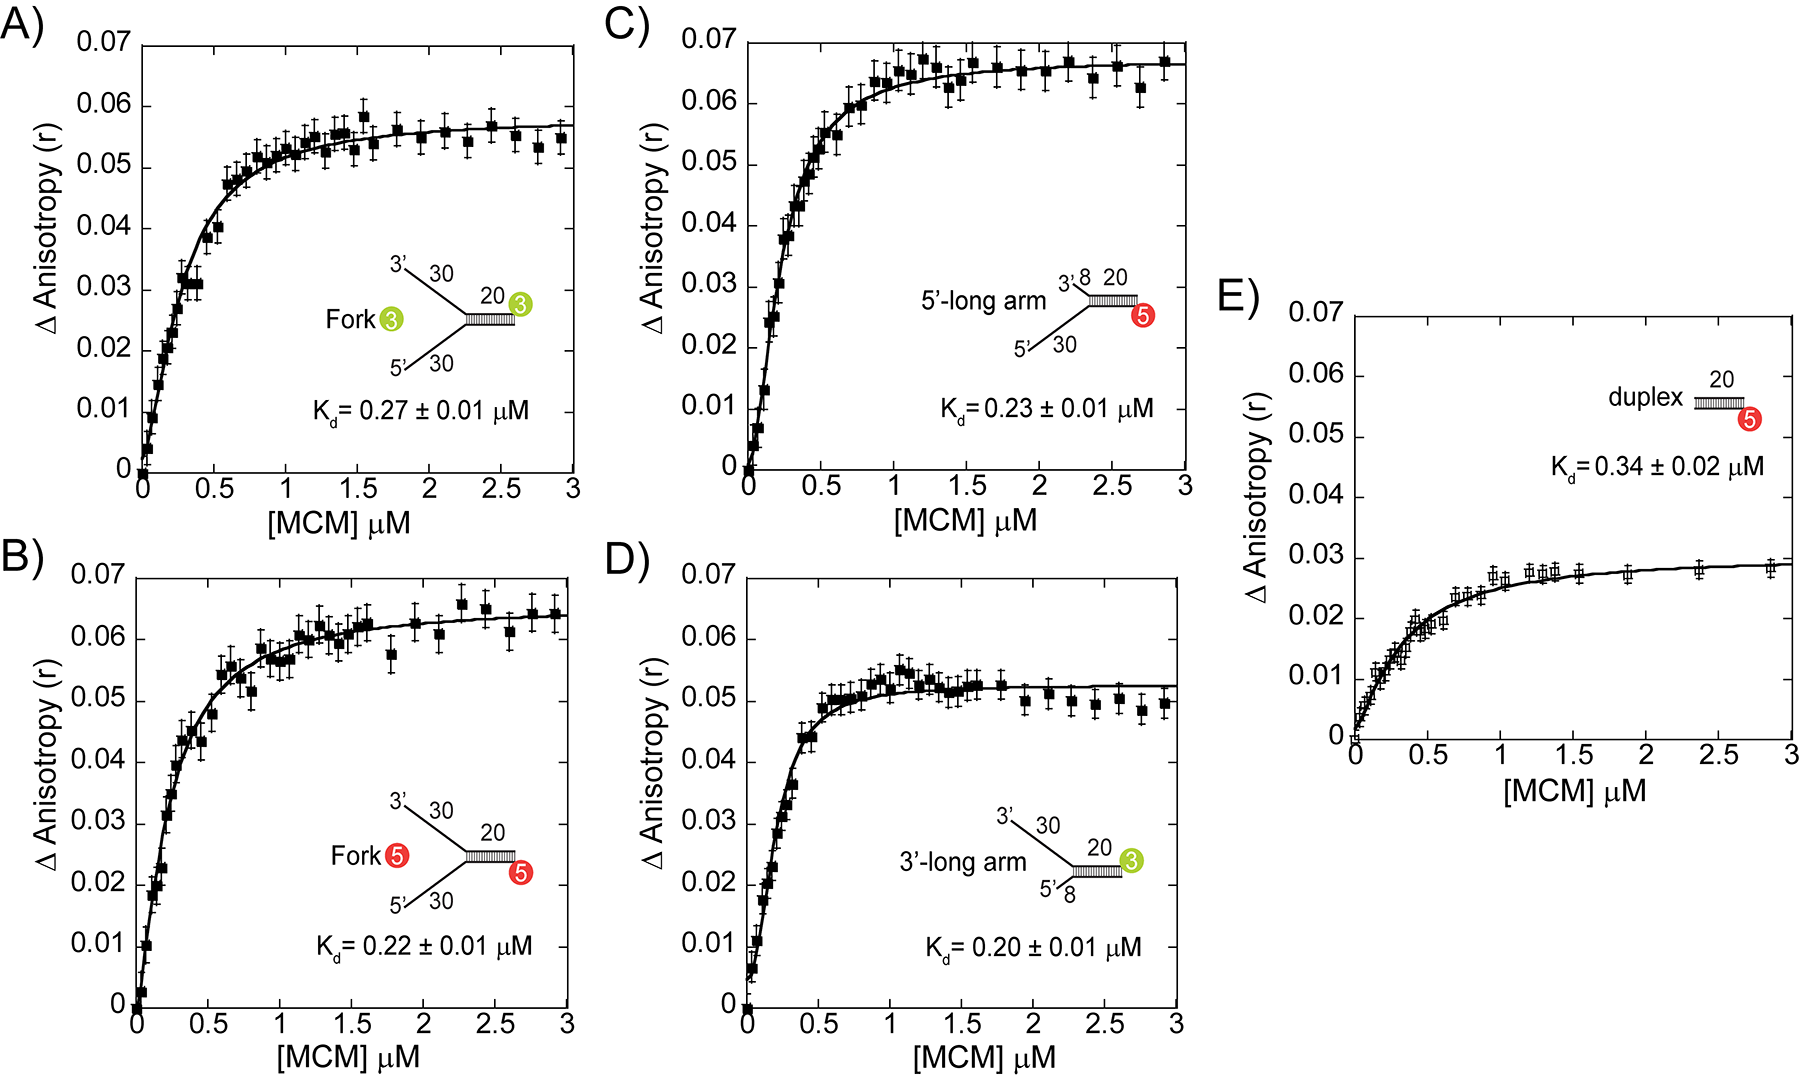

Supplement: supp [file elife-46096-supp-v1.zip › elife_poa_e46096_Figure_1_figure_supplement_3.tif]

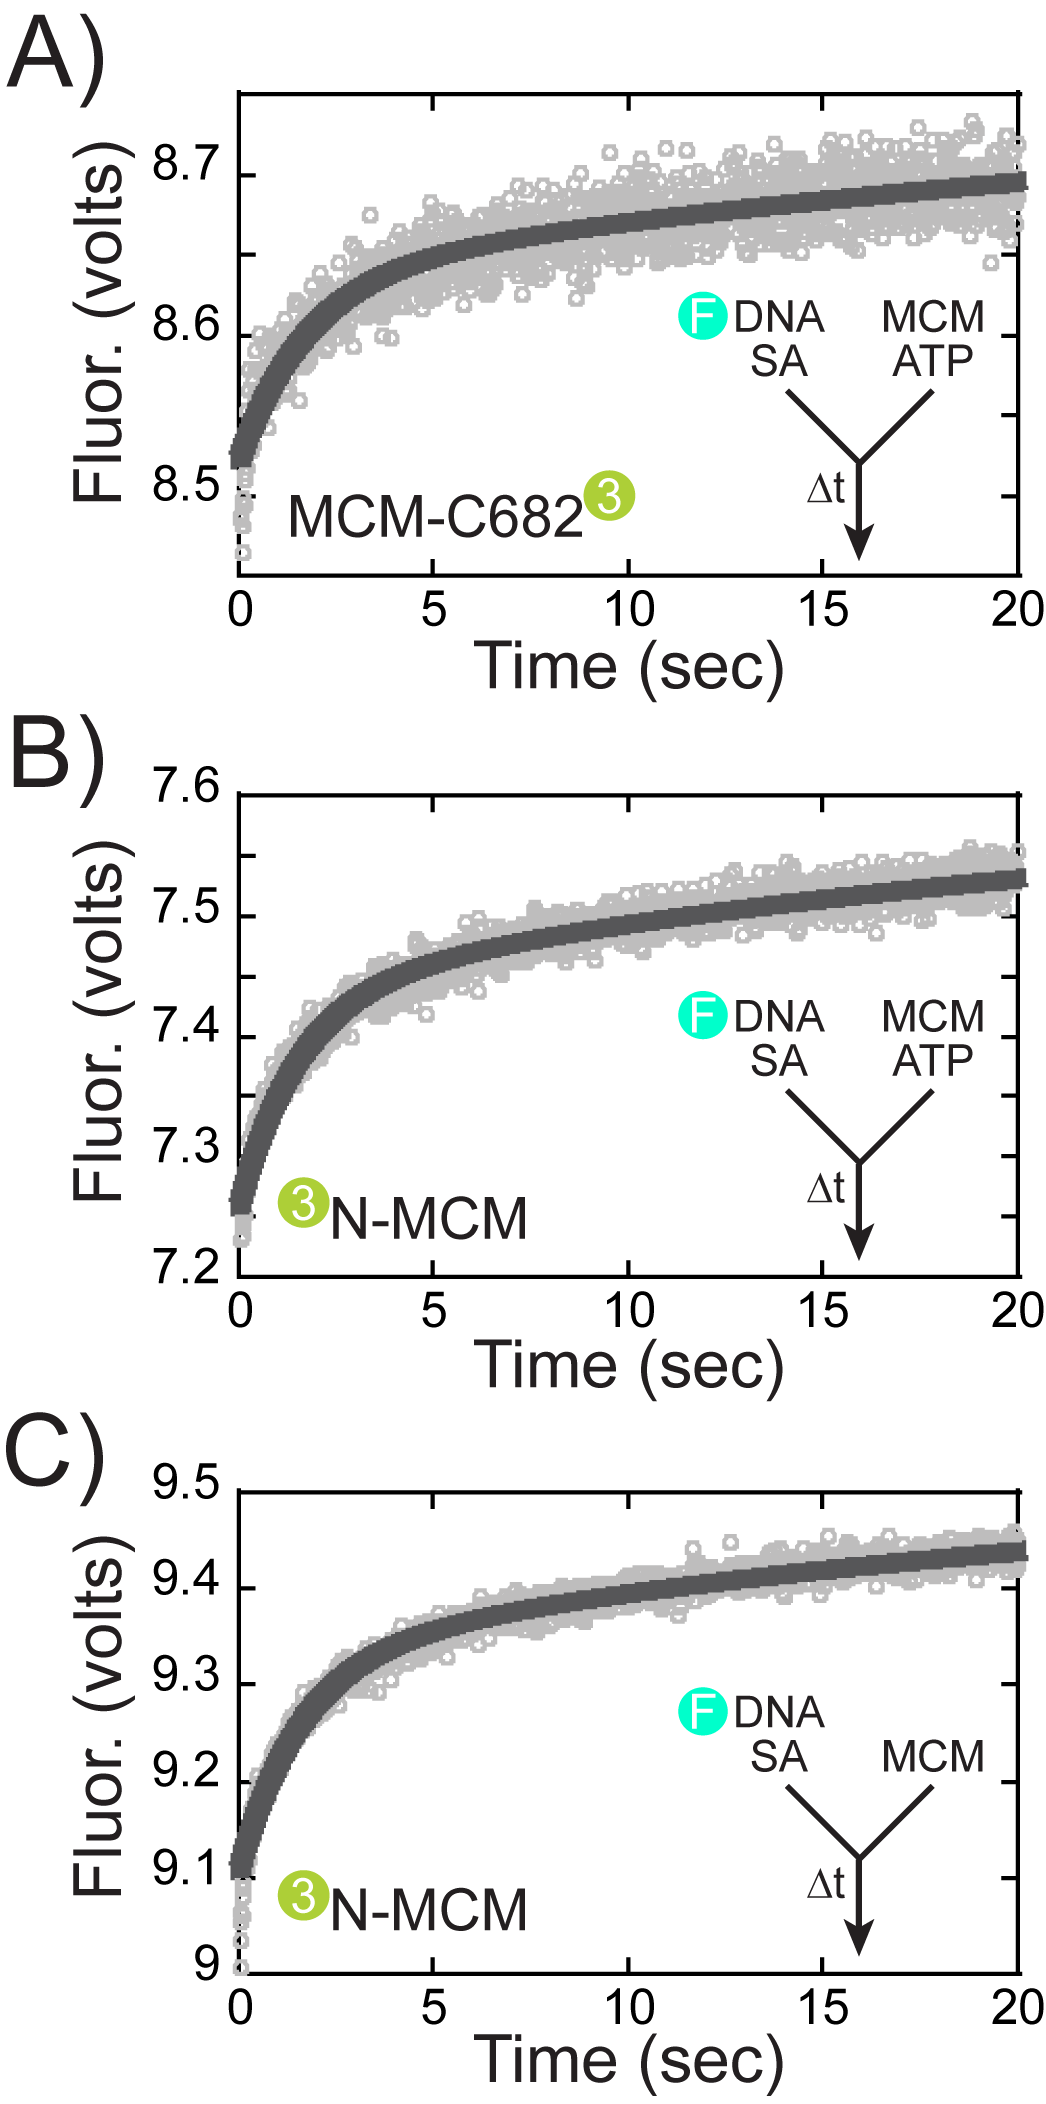

Supplement: supp [file elife-46096-supp-v1.zip › elife_poa_e46096_Figure_6_figure_supplement_1.tif]

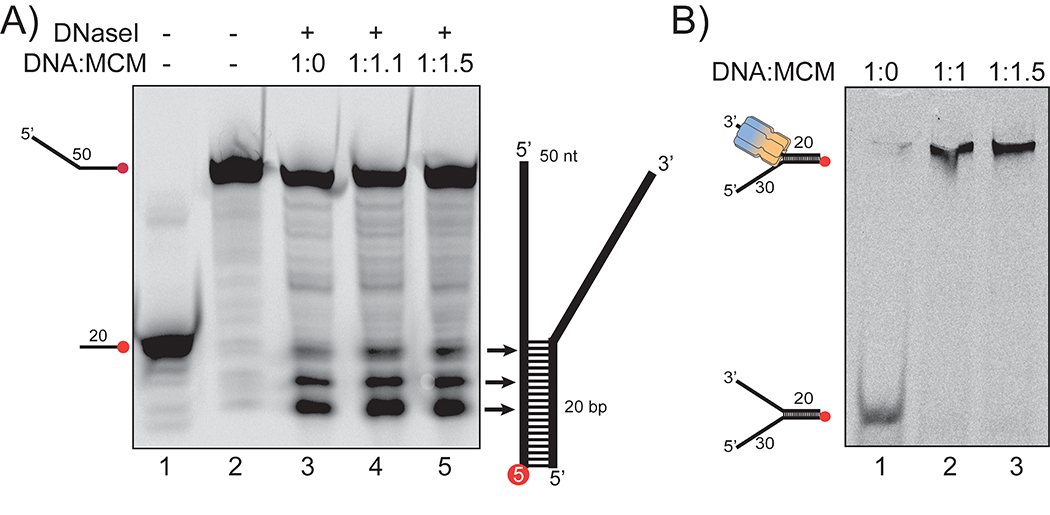

Supplement: supp [file elife-46096-supp-v1.zip › elife_poa_e46096_Figure_1_figure_supplement_4.tif]
